# Supplementary material
Source: publisher site journal article supplement (https://www.dovepress.com/article/395893)
Supplement: Supplementary file 1 [file get_supplementary_file.php]

**Supplementary Table 1** Abstracted symptoms associated with the DSM-V criteria

| DSM-V criteria                                                                                                                                                                                                                                                   | Abstracted symptoms                                                                                                                                                                                                                                                  |
|------------------------------------------------------------------------------------------------------------------------------------------------------------------------------------------------------------------------------------------------------------------|----------------------------------------------------------------------------------------------------------------------------------------------------------------------------------------------------------------------------------------------------------------------|
| <p>A. The consciousness disorder and reduced ability to sustain, focus, or shift attention</p>                                                                                                                                                                   | <p>Any verbatim comment e.g. "agitated", "drowsiness", "somnolent", "not alert", "sleep poorly", "fumbles", "pulls out urine probe", "tears of wound dressing"<br/>Any formal rating e.g. GCS, RASS</p>                                                              |
| <p>B. An additional disturbance in cognition (eg. memory deficit, disorientation, language, visuospatial ability, or perception).</p>                                                                                                                            | <p>Any comment e.g. "confused", "disorientated", "talking nonsense", "hallucinations"</p>                                                                                                                                                                            |
| <p>C. The cognitive changes that can not be better interpreted as established, pre-existing, or evolving dementia</p>                                                                                                                                            | <p>Any formal assessment e.g. GCS, RASS; any formal cognitive assessment e.g. AMT, MMSE. Any formal specialty assessment, e.g. neurology, geriatric medicine, liaison psychiatry. Any verbatim comment such as "more confused", "comatose", "no response at all"</p> |
| <p>D. This disturbance develops over a short period of time (hours to days) and fluctuates throughout the day</p>                                                                                                                                                | <p>Any verbatim comment indicating a change in mental state which was recovered in short time after treatment.</p>                                                                                                                                                   |
| <p>E. The evidence from the physical examination, clinical history or laboratory findings indicates disturbance caused by a direct physiologic consequence of medication use, an intoxicating substance, a general medical condition, or more than one cause</p> | <p>General clinical vignette, including metabolic and laboratory parameters taken closest to date of prevalence study.</p>                                                                                                                                           |

**Abbreviations:** AMT: Abbreviated Mental Test

DSM-V: Diagnostic and Statistical Manual of Mental Disorders, 5th edition

GCS: Glasgow Coma Scale

MMSE Mini-Mental State Examination

RASS: Richmond Agitation-Sedation Scale

**Supplementary Table 2** Multicollinearity analysis of related risk factors for POD

| Collinear statistics    |           |                           |
|-------------------------|-----------|---------------------------|
| Variables               | Tolerance | Variance inflation factor |
| Age                     | 0.934     | 1.070                     |
| ASA status $\geq 3$     | 0.950     | 1.053                     |
| SUA/Cr ratio $\leq 3.3$ | 0.985     | 1.015                     |
| Dexmedetomidine         | 0.980     | 1.021                     |

**Abbreviations:** ASA: American Society of Anaesthesiologists

POD: Postoperative Delirium      SUA/Cr ratio: Serum Uric Acid to Creatinine ratio
